# Supplementary material
Source: Royal Society of Chemistry journal article supplement (https://www.rsc.org/suppdata/jm/1999/2287/906147i.doc)
Supplement: Supplementary file 1 [file 906147i.doc]

**Supplementary information**

# Crystallographic data for TNU-1

| Wavelength | | 1.400131Å |
| --- | --- | --- |
| Temperature | | 298K |
| 2 range | | 5-100 (Range used 5-90) |
| Step Size | | 0.01 2 |
| Count time | | 5-40 2 1 s/p 40-100 2 3 s/p |
| Number of reflections | | 1137 |
| Number of profile parameters | | 15 |
| Number of structural parameters | | 84 |
| Number of constraints | | 16 |
| Unit cell | a | 8.65905(11)Å |
|  | b | 14.17102(13)Å |
|  | c | 16.32830(17)Å |
| Space group | | Pnma |
| Residuals | Rexp | 4.92 |
|  | Rwp | 12.07 |
|  | Rp | 9.16 |
|  | Rb | 9.74 |
|  | 2 | 6.38 |

**Atomic Parameters for TNU-1 with Estimated Standard Deviations in Parentheses**

| Atom | X | Y | Z | Uiso (Å)2 | Occupancy |
| --- | --- | --- | --- | --- | --- |
| (Si/Ga)1 | 0.4445(6) | 0.13966(27) | 0.53976(22) | 0.0278(6) | 0.68/0.32 |
| (Si/Ga)2 | 0.8904(6) | 0.01945(25) | 0.71869(26) | 0.0278(6) | 0.68/0.32 |
| (Si/Ga)3 | 0.5984(6) | -0.03880(24) | 0.62816(24) | 0.0278(6) | 0.68/0.32 |
| (Si/Ga)4 | 0.1827(6) | 0.13367(24) | 0.66104(22) | 0.0278(6) | 0.68/0.32 |
| O5 | 0.5848(12) | 0.0745(5) | 0.5841(6) | 0.0230(13) | 1.0 |
| O6 | 0.4865(10) | -0.0305(6) | 0.7078(5) | 0.0230(13) | 1.0 |
| O7 | 0.2561(11) | 0.1096(6) | 0.5725(4) | 0.0230(13) | 1.0 |
| O8 | 0.0138(11) | 0.0706(6) | 0.6573(6) | 0.0230(13) | 1.0 |
| O9 | 0.4523(15) | 0.1217(6) | 0.4353(5) | 0.0230(13) | 1.0 |
| O10 | 0.4981(19) | 0.25 | 0.5624(8) | 0.0230(13) | 1.0 |
| O11 | 0.2831(14) | 0.1029(6) | 0.7423(4) | 0.0230(13) | 1.0 |
| O12 | 0.7909(9) | -0.0389(6) | 0.6594(5) | 0.0230(13) | 1.0 |
| O13 | 0.1118(19) | 0.25 | 0.6634(7) | 0.0230(13) | 1.0 |
| K1 | 0.2946(10) | 0.25 | 0.8669(4) | 0.017(4) | 0.789(5) |
| K2 | 0.1765(26) | 0.25 | 0.1611(9) | 0.204(8) | 0.640(5) |
| K3 | 0 | 0 | 0.5 | 0.055(5) | 0.538(4) |
| K4 | 0.3700(22) | 0.0812(10) | 0.0279(10) | 0.304(10) | 0.462(4) |
| OW1 | 0.1449(32) | 0.25 | 0.3406(11) | 0.063(8) | 0.896(12) |
| OW2 | 0.2854(29) | 0.0458(11) | 0.1570(10) | 0.273(10) | 1.0 |
| OW4 | 0.4523(40) | 0.25 | 0.0396(15) | 0.316(18) | 1.0 |
| OW5 | 0.4753(39) | 0.25 | 0.2746(14) | 0.066(7) | 0.760(12) |

†N.B. Temperature factors for framework atoms, based on type, were refined so as to be equal. Occupancies for Si and Ga were fixed to the value expected from chemical analysis. OW signifies the oxygen atom of the extraframework water.

**Selected Framework Distances and Angles for TNU-1 with Estimated Standard Deviations in Parentheses†**

| Bond | (Å) | Angle (O-T-O) | (º) | Angle (T-O-T) | (º) |
| --- | --- | --- | --- | --- | --- |
| T1-O5 | 1.689(7) | O5-T1-O7 | 113.7(5) | T1-O5-T3 | 136.5(7) |
| T1-O7 | 1.768(8) | O5-T1-O9 | 108.4(6) |  |  |
| T1-O9 | 1.725(7) | O5-T1-O10 | 102.5(6) | T2-O6-T3 | 155.7(7) |
| T1-O10 | 1.673(6) | O7-T1-O9 | 107.4(5) |  |  |
|  |  | O7-T1-O10 | 114.5(7) | T1-O7-T4 | 125.6(6) |
|  |  | O9-T1-O10 | 110.2(6) |  |  |
| T2-O6 | 1.623(7) | O6-T2-O8 | 108.3(7) | T2-O8-T4 | 140.1(7) |
| T2-O8 | 1.641(8) | O6-T2-O11 | 108.6(6) |  |  |
| T2-O11 | 1.633(8) | O6-T2-O12 | 121.2(5) | T1-O9-T3 | 135.2(6) |
| T2-O12 | 1.538(7) | O8-T2-O11 | 106.4(5) |  |  |
|  |  | O8-T2-O12 | 102.5(6) | T1-O10-T1 | 138.4(11) |
|  |  | O11-T2-O12 | 108.4(6) |  |  |
| T3-O5 | 1.698(7) | O5-T3-O6 | 105.8(5) | T2-O11-T4 | 143.8(6) |
| T3-O6 | 1.623(6) | O5-T3-O9 | 113.0(5) |  |  |
| T3-O9 | 1.679(7) | O5-T3-O12 | 103.2(4) | T2-O12-T3 | 134.2(6) |
| T3-O12 | 1.744(7) | O6-T3-O9 | 111.1(6) |  |  |
|  |  | O6-T3-O12 | 109.7(4) | T4-O13-T4 | 139.1(11) |
|  |  | O9-T3-O12 | 113.6(6) |  |  |
| T4-O7 | 1.616(7) | O7-T4-O8 | 101.3(5) |  |  |
| T4-O8 | 1.708(8) | O7-T4-O11 | 117.3(5) |  |  |
| T4-O11 | 1.645(7) | O7-T4-O13 | 110.8(5) |  |  |
| T4-O13 | 1.760(6) | O8-T4-O11 | 110.2(6) |  |  |
|  |  | O8-T4-O13 | 100.6(7) |  |  |
|  |  | O11-T4-O13 | 114.5(6) |  |  |

†N.B. “T” signifies Si or Ga.

Rietveld plot for TNU-1: observed data (+), calculated profile (solid line) and difference (lower trace). The tick marks represent the positions of allowed reflections.
